# Supplementary material
Source: PubMed Central journal article supplement (PMC2330322)
Supplement: plntphys_pp.107.114603_1.pdf [file plntphys_pp.107.114603_1.pdf]

## SUPPLEMENTAL TABLES

**Table S1.** Pairwise comparison of *PRO<sub>INO</sub>:INO/YAB3* with *PRO<sub>INO</sub>:III*

| Genotype <sup>a</sup> | <i>PRO<sub>INO</sub></i> : <sup>b</sup><br>Transgene | P-value <sup>c</sup>   | Adjusted Alpha<br>Value <sup>d</sup> | Significantly<br>Different |
|-----------------------|------------------------------------------------------|------------------------|--------------------------------------|----------------------------|
| <i>INO sup-5</i>      |                                                      | 4.40x10 <sup>-18</sup> | 8.33x10 <sup>-04</sup>               | Yes                        |
| <i>ino-1 SUP</i>      |                                                      | 9.19x10 <sup>-13</sup> | 9.09x10 <sup>-04</sup>               | Yes                        |
|                       | 333                                                  | 1.91x10 <sup>-11</sup> | 1.00x10 <sup>-03</sup>               | Yes                        |
|                       | 333i                                                 | 1.67x10 <sup>-09</sup> | 1.11x10 <sup>-03</sup>               | Yes                        |
|                       | 33I                                                  | 4.44x10 <sup>-09</sup> | 1.25x10 <sup>-03</sup>               | Yes                        |
|                       | I33                                                  | 9.59x10 <sup>-08</sup> | 1.43x10 <sup>-03</sup>               | Yes                        |
|                       | 3I3                                                  | 1.72x10 <sup>-06</sup> | 1.67x10 <sup>-03</sup>               | Yes                        |
|                       | I3I                                                  | 2.51x10 <sup>-04</sup> | 2.00x10 <sup>-03</sup>               | Yes                        |
| Wild type             |                                                      | 2.69x10 <sup>-03</sup> | 2.50x10 <sup>-03</sup>               | No                         |
|                       | 3II                                                  | 5.09x10 <sup>-02</sup> | 3.33x10 <sup>-03</sup>               | No                         |
|                       | II3                                                  | 5.20x10 <sup>-02</sup> | 5.00x10 <sup>-03</sup>               | No                         |
|                       | III3                                                 | 3.67x10 <sup>-01</sup> | 1.00x10 <sup>-02</sup>               | No                         |

<sup>a</sup>Ovules were examined in wild-type, *ino-1*, or *sup-5* mutant plants. <sup>b</sup>Transgenes were constructed as transcriptional fusions of the listed coding sequence with *PRO<sub>INO</sub>* and examined in an *ino-1* mutant background. <sup>c</sup>The phenotypic class distribution of each set was calculated using Fisher's Exact Test to determine the p-value. <sup>d</sup>Alpha values were adjusted by applying the modified Bonferroni adjustment to the alpha value ( $\alpha = 0.01$ ).

**Table S2.** Pairwise comparison of *PRO<sub>INO</sub>:INO/YAB3* with *PRO<sub>INO</sub>:333*

| Genotype <sup>a</sup> | <i>PRO<sub>INO</sub></i> : <sup>b</sup><br>Transgene | P-value <sup>c</sup>   | Adjusted Alpha<br>Value <sup>d</sup> | Significantly<br>Different |
|-----------------------|------------------------------------------------------|------------------------|--------------------------------------|----------------------------|
| Wild type             |                                                      | 7.10x10 <sup>-13</sup> | 8.33x10 <sup>-04</sup>               | Yes                        |
| <i>ino-1 SUP</i>      |                                                      | 7.10x10 <sup>-13</sup> | 8.33x10 <sup>-04</sup>               | Yes                        |
| <i>INO sup-5</i>      |                                                      | 2.24x10 <sup>-12</sup> | 1.00x10 <sup>-03</sup>               | Yes                        |
|                       | III                                                  | 1.91x10 <sup>-11</sup> | 1.11x10 <sup>-03</sup>               | Yes                        |
|                       | III3                                                 | 6.14x10 <sup>-10</sup> | 1.25x10 <sup>-03</sup>               | Yes                        |
|                       | 3II                                                  | 2.01x10 <sup>-09</sup> | 1.43x10 <sup>-03</sup>               | Yes                        |
|                       | 3I3                                                  | 2.54x10 <sup>-07</sup> | 1.67x10 <sup>-03</sup>               | Yes                        |
|                       | II3                                                  | 2.75x10 <sup>-07</sup> | 2.00x10 <sup>-03</sup>               | Yes                        |
|                       | I33                                                  | 6.02x10 <sup>-04</sup> | 2.50x10 <sup>-03</sup>               | Yes                        |
|                       | 33I                                                  | 3.00x10 <sup>-03</sup> | 3.33x10 <sup>-03</sup>               | Yes                        |
|                       | I3I                                                  | 5.20x10 <sup>-03</sup> | 5.00x10 <sup>-03</sup>               | Yes <sup>e</sup>           |
|                       | 333i                                                 | 5.89x10 <sup>-02</sup> | 1.00x10 <sup>-02</sup>               | No                         |

<sup>a</sup>Ovules were examined in wild-type, *ino-1*, or *sup-5* mutant plants. <sup>b</sup>Transgenes were constructed as transcriptional fusions of the listed coding sequence with *PRO<sub>INO</sub>* and examined in an *ino-1* mutant background. <sup>c</sup>The phenotypic class distribution of each set was calculated using Fisher's Exact Test to determine the p-value. <sup>d</sup>Alpha values were adjusted by applying the modified Bonferroni adjustment to the alpha value ( $\alpha = 0.01$ ). <sup>e</sup>For *PRO<sub>INO</sub>:I3I* versus *PRO<sub>INO</sub>:333*, although the p-value > alpha value, the difference observed is considered significant due to the closeness of these values and the presence of ten wild-type individuals containing *PRO<sub>INO</sub>:I3I* while *PRO<sub>INO</sub>:333* individuals never appeared wild-type.

**Table S3.** Pairwise comparison of  $PRO_{INO}:INO/YAB5$  with  $PRO_{INO}:III$ 

| Genotype <sup>a</sup> | $PRO_{INO}$ : <sup>b</sup><br>Transgene | P-value <sup>c</sup>   | Adjusted Alpha<br>Value <sup>d</sup> | Significantly<br>Different |
|-----------------------|-----------------------------------------|------------------------|--------------------------------------|----------------------------|
| <i>INO sup-5</i>      |                                         | $4.40 \times 10^{-18}$ | $1.00 \times 10^{-03}$               | Yes                        |
| <i>ino-1 SUP</i>      |                                         | $9.19 \times 10^{-13}$ | $1.11 \times 10^{-03}$               | Yes                        |
|                       | 555                                     | $2.55 \times 10^{-09}$ | $1.25 \times 10^{-03}$               | Yes                        |
|                       | 515                                     | $2.05 \times 10^{-08}$ | $1.43 \times 10^{-03}$               | Yes                        |
|                       | 15I                                     | $6.66 \times 10^{-07}$ | $1.67 \times 10^{-03}$               | Yes                        |
|                       | 155                                     | $1.50 \times 10^{-06}$ | $2.00 \times 10^{-03}$               | Yes                        |
|                       | 5II                                     | $1.90 \times 10^{-06}$ | $2.50 \times 10^{-03}$               | Yes                        |
|                       | 55I                                     | $1.30 \times 10^{-03}$ | $3.33 \times 10^{-03}$               | Yes                        |
| Wild type             |                                         | $2.69 \times 10^{-03}$ | $5.00 \times 10^{-03}$               | Yes                        |
|                       | II5                                     | $1.59 \times 10^{-02}$ | $1.00 \times 10^{-02}$               | No                         |

<sup>a</sup>Ovules were examined in wild-type, *ino-1*, or *sup-5* mutant plants. <sup>b</sup>Transgenes were constructed as transcriptional fusions of the listed coding sequence with  $PRO_{INO}$  and examined in an *ino-1* mutant background. <sup>c</sup>The phenotypic class distribution of each set was calculated using Fisher's Exact Test to determine the p-value. <sup>d</sup>Alpha values were adjusted by applying the modified Bonferroni adjustment to the alpha value ( $\alpha = 0.01$ ).

**Table S4.** Pairwise comparison of  $PRO_{INO}:INO/YAB5$  with  $PRO_{INO}:555$ 

| Genotype <sup>a</sup> | $PRO_{INO}$ : <sup>b</sup><br>Transgene | P-value <sup>c</sup>   | Adjusted Alpha<br>Value <sup>d</sup> | Significantly<br>Different |
|-----------------------|-----------------------------------------|------------------------|--------------------------------------|----------------------------|
| <i>Wild type</i>      |                                         | $1.44 \times 10^{-13}$ | $1.00 \times 10^{-03}$               | Yes                        |
| <i>INO sup-5</i>      |                                         | $4.97 \times 10^{-13}$ | $1.11 \times 10^{-03}$               | Yes                        |
|                       | III                                     | $2.55 \times 10^{-09}$ | $1.25 \times 10^{-03}$               | Yes                        |
|                       | I5I                                     | $1.76 \times 10^{-07}$ | $1.43 \times 10^{-03}$               | Yes                        |
|                       | 5II                                     | $8.31 \times 10^{-07}$ | $1.67 \times 10^{-03}$               | Yes                        |
|                       | II5                                     | $3.83 \times 10^{-06}$ | $2.00 \times 10^{-03}$               | Yes                        |
|                       | 5I5                                     | $8.19 \times 10^{-06}$ | $2.50 \times 10^{-03}$               | Yes                        |
|                       | 55I                                     | $6.47 \times 10^{-05}$ | $3.33 \times 10^{-03}$               | Yes                        |
|                       | I55                                     | $1.74 \times 10^{-04}$ | $5.00 \times 10^{-03}$               | Yes                        |
| <i>ino-1 SUP</i>      |                                         | $8.76 \times 10^{-02}$ | $1.00 \times 10^{-02}$               | No                         |

<sup>a</sup>Ovules were examined in wild-type, *ino-1*, or *sup-5* mutant plants. <sup>b</sup>Transgenes were constructed as transcriptional fusions of the listed coding sequence with  $PRO_{INO}$  and examined in an *ino-1* mutant background. <sup>c</sup>The phenotypic class distribution of each set was calculated using Fisher's Exact Test to determine the p-value. <sup>d</sup>Alpha values were adjusted by applying the modified Bonferroni adjustment to the alpha value ( $\alpha = 0.01$ ).

**Table S5.** Pairwise comparison of  $PRO_{INO}:INO/CCC$  with  $PRO_{INO}:III$ 

| Genotype <sup>a</sup> | $PRO_{INO}$ : <sup>b</sup><br>Transgene | P-value <sup>c</sup>   | Adjusted Alpha<br>Value <sup>d</sup> | Significantly<br>Different |
|-----------------------|-----------------------------------------|------------------------|--------------------------------------|----------------------------|
| <i>INO sup-5</i>      |                                         | $4.40 \times 10^{-18}$ | $1.67 \times 10^{-03}$               | Yes                        |
|                       | CCC                                     | $4.30 \times 10^{-14}$ | $2.00 \times 10^{-03}$               | Yes                        |
| <i>ino-1 SUP</i>      |                                         | $9.19 \times 10^{-13}$ | $2.50 \times 10^{-03}$               | Yes                        |
|                       | CCCi                                    | $1.36 \times 10^{-08}$ | $3.33 \times 10^{-03}$               | Yes                        |
|                       | IIIc                                    | $1.94 \times 10^{-05}$ | $5.00 \times 10^{-03}$               | Yes                        |
| <i>Wild type</i>      |                                         | $2.69 \times 10^{-03}$ | $1.00 \times 10^{-02}$               | Yes                        |

<sup>a</sup>Ovules were examined in wild-type, *ino-1*, or *sup-5* mutant plants. <sup>b</sup>Transgenes were constructed as transcriptional fusions of the listed coding sequence with  $PRO_{INO}$  and examined in an *ino-1* mutant background. <sup>c</sup>The phenotypic class distribution of each set was calculated using Fisher's Exact Test to determine the p-value. <sup>d</sup>Alpha values were adjusted by applying the modified Bonferroni adjustment to the alpha value ( $\alpha = 0.01$ ).

**Table S6.** Pairwise comparison of  $PRO_{INO}:INO/CCC$  with  $PRO_{INO}:CCC$ 

| Genotype <sup>a</sup> | $PRO_{INO}$ : <sup>b</sup><br>Transgene | P-value <sup>c</sup>   | Adjusted Alpha<br>Value <sup>d</sup> | Significantly<br>Different |
|-----------------------|-----------------------------------------|------------------------|--------------------------------------|----------------------------|
| <i>Wild type</i>      |                                         | $1.58 \times 10^{-14}$ | $1.67 \times 10^{-03}$               | Yes                        |
|                       | III                                     | $4.30 \times 10^{-14}$ | $2.00 \times 10^{-03}$               | Yes                        |
| <i>ino-1 SUP</i>      |                                         | $4.11 \times 10^{-13}$ | $2.50 \times 10^{-03}$               | Yes                        |
| <i>INO sup-5</i>      |                                         | $8.95 \times 10^{-08}$ | $3.33 \times 10^{-03}$               | Yes                        |
|                       | IIIc                                    | $1.87 \times 10^{-04}$ | $5.00 \times 10^{-03}$               | Yes                        |
|                       | CCCi                                    | $4.61 \times 10^{-04}$ | $1.00 \times 10^{-02}$               | Yes                        |

<sup>a</sup>Ovules were examined in wild-type, *ino-1*, or *sup-5* mutant plants. <sup>b</sup>Transgenes were constructed as transcriptional fusions of the listed coding sequence with  $PRO_{INO}$  and examined in an *ino-1* mutant background. <sup>c</sup>The phenotypic class distribution of each set was calculated using Fisher's Exact Test to determine the p-value. <sup>d</sup>Alpha values were adjusted by applying the modified Bonferroni adjustment to the alpha value ( $\alpha = 0.01$ ).
